# Supplementary material for: Barotropic Tides in MPAS-Ocean: Impact of Ice Shelf Cavities
Source: Copernicus journal article supplement (doi:10.5194/gmd-2022-188), 2022-08-01
Supplement: Supplementary file [file gmd-2022-188-AC3-supplement.pdf]

# Cover Letter

Dr. Juan A. Añel  
Geosci. Model Dev. Exec. Editor

5 Re: gmd–2022–188  
Barotropic Tides in MPAS-Ocean: Impact of Ice Shelf Cavities  
by Nairita Pal, Kristin N. Barton, Mark R. Petersen, Steven R. Brus, Darren Engwirda, Brian K. Arbic, Andrew F. Roberts,  
Joannes J. Westerink, Damrongsak, Wirasaet

Dear Editors,

10 Thank you very much for sending us the report of the Referee and for giving us the chance to address the concerns of the Referee. We also thank the Referee for taking the time to prepare the report on our paper.

We are pleased to receive the positive review of our manuscript from the Referee. It is encouraging to read that the Referee feels our work on implementing tides in MPAS–Ocean is significant, and will enable more accurate tidal predictions, and hence will facilitate prediction of global climate variability.

15 We give below detailed responses to the questions and comments of the Referee. In addition, we have added the particular version of the Energy Exascale Earth System Model that we use in the title of the manuscript, the main body of the paper, as well as the code availability section, as suggested by the editorial team. The changes in our revised manuscript, which have been made to address the comments of the Referee and the editorial team, are indicated in blue. We have addressed the concerns fully. We hope, therefore, that our paper will now be accepted for publication in Geoscientific Model Development.

20 Thanking you and with our best regards,

Yours sincerely,

Nairita Pal (on behalf of all authors)

25 The authors are thankful for the reviewers' insightful comments and suggestions that contribute to the improvement of the manuscript. Please find a point-by-point response to each of the remarks made by the reviewers. Modified or added text is marked in blue font in the revised manuscript. All line numbers in the responses refer to the "track changes" version of the document.

### Reviewer 1

30 *Thank you for your contribution and the work that you have presented in this manuscript. I have read your paper with great interest. The work presented here falls within the scope of the journal, and the work has been carried out using sound scientific knowledge and principles. Enclosed here are some minor comments*

We thank the reviewer for the positive review of our work. It is truly encouraging to note that the reviewer finds the work interesting and scientific.

The comments are addressed below.

1. *L-16 Precise amplitude and frequency? Needs further explanation*

35 Thank you for the comment. The sea surface height oscillations caused by the tidal astronomical forcing has a well-defined mathematical expression, unlike those caused by other factors such as winds, ocean temperature, salinity etc. As we elaborate in Page 5 Section 2.1 (Eqs. 4 and 5), the sea surface height oscillation is given by the equation

$$\eta_{EQsd,c} = A_c f_c(t_{ref}) L \cos^2(\phi) \cos[\omega_c(t - t_{ref}) + \chi_c(t_{ref}) + \nu_c(t_{ref}) + 2\lambda] \quad (1)$$

$$\eta_{EQd,c} = A_c f_c(t_{ref}) L \sin(2\phi) \cos[\omega_c(t - t_{ref}) + \chi_c(t_{ref}) + \nu_c(t_{ref}) + \lambda], \quad (2)$$

40 However, we understand that the oscillations are not precise due to the effects of ocean circulation, winds, temperature, salinity, etc. Thus in our revised manuscript we replace the word "precise" with "well-defined" (Page 1 L-16).

2. *Fig 2- can the resolution of this figure be improved?*

Thank you. The resolution of the figure has been improved.

3. *All the equations presented should be centered. Refer to journal guideline*

45 Thank you for the comment. Unfortunately, the typesetting of the equations is being done by the journal template automatically, and the equations are indeed slightly off-centered in standard published articles (e.g., [this article](#)).

4. *L-69-70 Can be rewritten as it may create confusion for the readers*

Thank you for pointing out the confusing sentence. We have revised the sentence as follows:

50 "The particular scalar drag scheme that we utilize in this study is the Jayne and St. Laurent scheme. This drag acts on a barotropic global ocean model forced with five major tidal constituents: M2, S2, N2, K1, and O1."

The correction is marked in blue font in our revised manuscript (Page 3).

5. *Fig A1- Is it possible to remove the dark background in this figure*

The dark background is removed from Fig. A1

55

6. *The inclusion of ice self-cavities significantly improves the overall tidal prediction; however, how do the effect of altering geometry near the ground line and grounding zone impact the prediction accuracy?*

Thank you for the question. In our work so far, we have not investigated the effect of the grounding line geometry on the prediction accuracy.

60

*Apart from these minor comments, the overall work that has been presented is significant, well written, and structured and should be considered for publication as the impact of this work will enable accurate tidal prediction, which will facilitate and enable us to predict global climate variability.*

The authors are very happy to read that the reviewer finds the work significant and impactful toward accurate tidal predictions. The reviewer's comments have greatly contributed to the improvement of our manuscript. We hope that our revised manuscript will be considered for publication in this journal.
